# Supplementary material
Source: MDPI journal article supplement (https://www.mdpi.com/2673-6284/11/2/15)
Supplement: s1 [file s1]

# Xylanase production by *Talaromyces amestolkiae* valuing agro-industrial byproducts

Giórgia S. Barbieri <sup>1</sup>, Heitor B. S. Bento <sup>1</sup>, Fernanda de Oliveira <sup>1</sup>, Flávio P. Picheli <sup>1</sup>, Fernando Masarin <sup>1</sup>, Lídia M. Dias <sup>1</sup>, Valéria C. Santos-Ebinuma <sup>1,\*</sup>.

<sup>1</sup> Department of Engineering Bioprocess and Biotechnology, School of Pharmaceutical Sciences, São Paulo State University (UNESP), Rodovia Araraquara-Jau km. 01, CEP:14800-903, Araraquara SP, Brazil.

\* Correspondence: valeria.ebinuma@unesp.br; Tel: 55-16-3301-4647

## Supplementary material

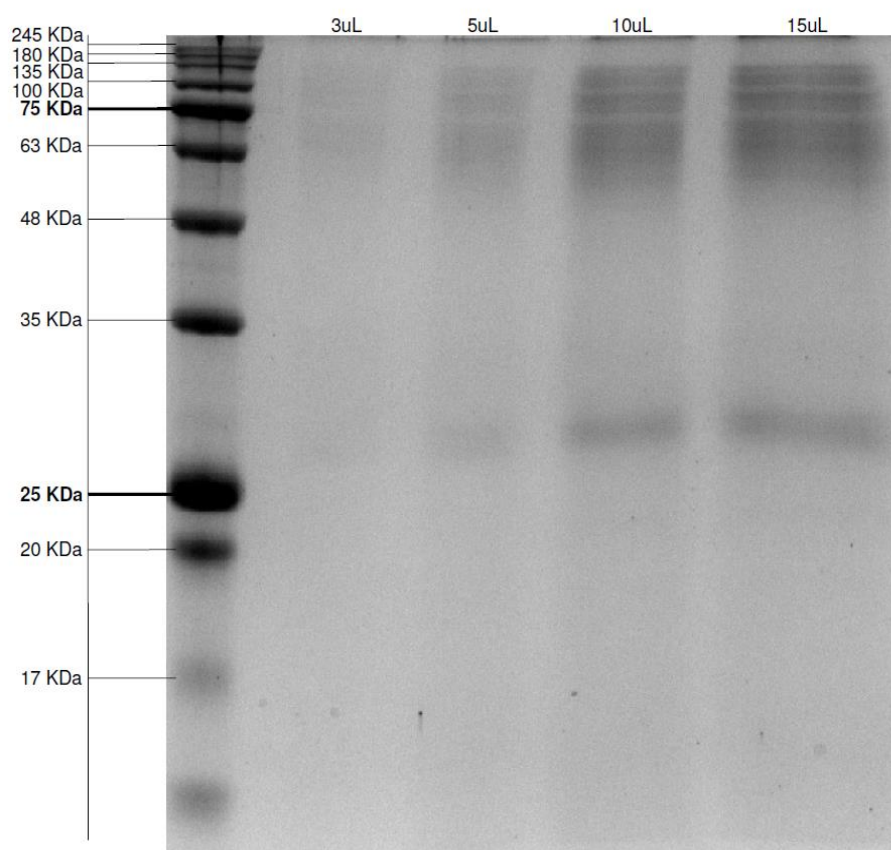

**Figure S1.** SDS-PAGE electrophoresis of the enzyme produced by *T. amestolkiae* cultivated in wheat-bran-based medium. The samples were prepared by resuspending the lyophilized extract in distilled water 0.01 % (w/v) which was centrifuged at 2000xg/15 min. The sample was incubated in Laemmli buffer (1:1) at 100 °C, 10 min for protein denaturation. The samples were added to SDS-PAGE 5%/10% (Mini-protean tetra cell BioRad®) under the conditions of 100 V, 20 mA. The molecular weight standard used was the BLUEye Sigma® (11-245 KDa) composed of 12 bands.
